# Supplementary material
Source: Springer Nature journal article supplement (https://www.springerprofessional.de/resource/supplementary/13638_2014_963_MOESM24_ESM.pdf/11898886)

# Delivery Probabaility

Delivery probability

- Without mitigation of misbehaving nodes
- with mitigation of misbehaving nodes

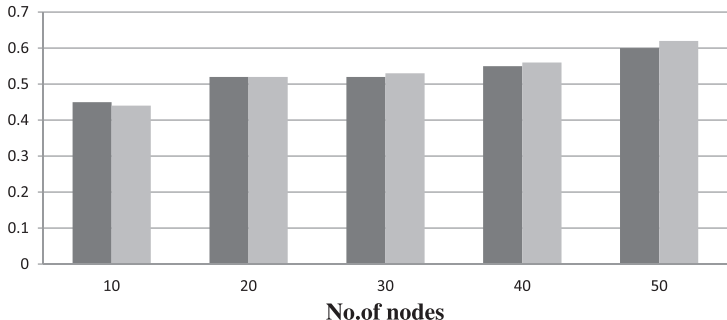

Supplement: MOESM24 [file 11898886]
